81. Angelucci F, De Bartolo P, Gelfo F, Foti F, Cutuli D, Bossù P, Caltagirone C, Petrosini L: Increased concentrations of nerve growth factor and brain-derived neurotrophic factor in the rat cerebellum after exposure to environmental enrichment. *Cerebellum* 2009; 8:499–506
82. Sun H, Zhang J, Zhang L, Liu H, Zhu H, Yang Y: Environmental enrichment influences BDNF and NR1 levels in the hippocampus and restores cognitive impairment in chronic cerebral hypoperfused rats. *Curr Neurovasc Res* 2010; 7:268–80
83. Branchi I, Karpova NN, D'Andrea I, Castrén E, Alleva E: Epigenetic modifications induced by early enrichment are associated with changes in timing of induction of BDNF expression. *Neurosci Lett* 2011; 495:168–72
84. Kuzumaki N, Ikegami D, Tamura R, Hareyama N, Imai S, Narita M, Torigoe K, Niikura K, Takeshima H, Ando T, Igarashi K, Kanno J, Ushijima T, Suzuki T, Narita M: Hippocampal epigenetic modification at the brain-derived neurotrophic factor gene induced by an enriched environment. *Hippocampus* 2011; 21:127–32

## ANESTHESIOLOGY REFLECTIONS FROM THE WOOD LIBRARY-MUSEUM

### Porter's Pain King: Ether in Alcohol “for Man and Beast”

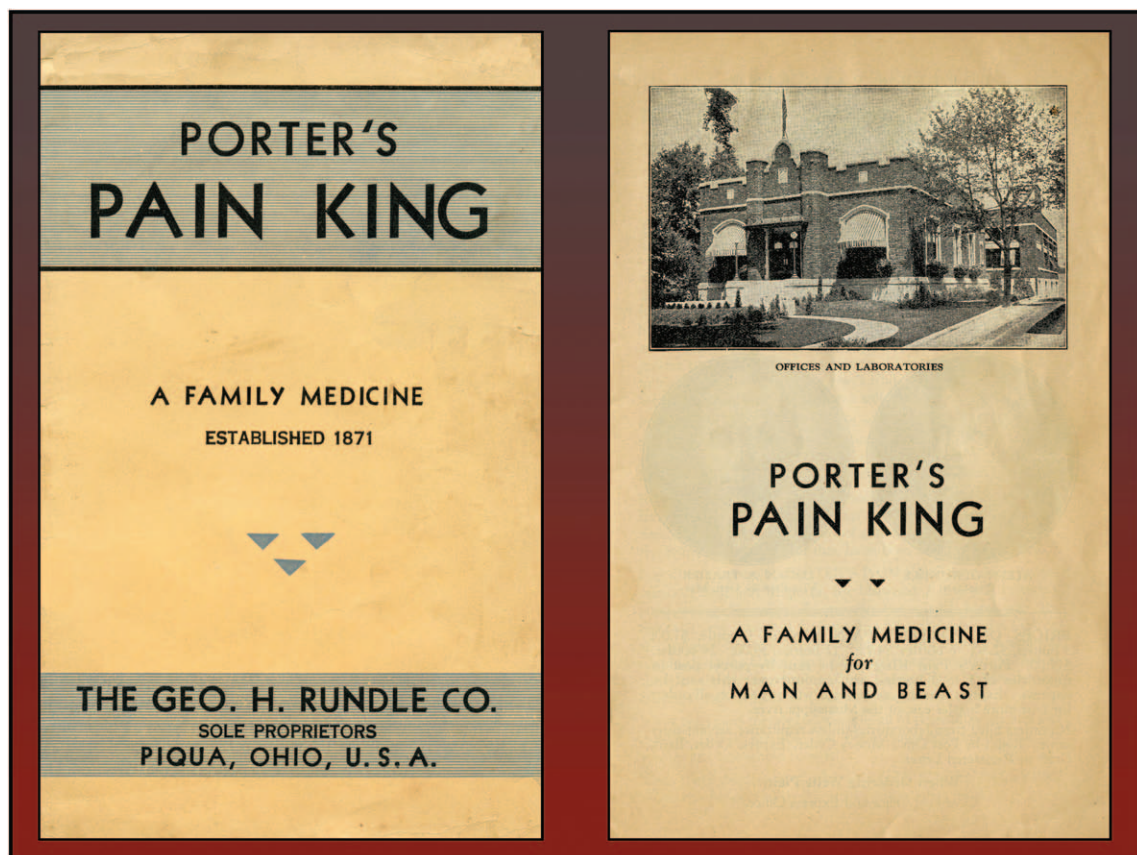

According to their brochure cover (*left*), the George H. Rundle Company owned and distributed “a Family Medicine for Man and Beast” — Porter’s Pain King. The brochure also depicts the company’s “Offices and Laboratories” (*right*), which were headquartered in Piqua, Ohio. Labeled as capable of relieving “Colds, Nervous and Sick Headache,” bottles of this “Family Liniment” were also touted for curing “Rheumatic and Neuralgic Pains, Toothache, Backache, Sprains, Bruises, and Burns.” Relief by this remedy was likely temporary but was likely aided by its “ETHER 12 MINIMS PER OUNCE” and certainly assisted by its “ALCOHOL [content of] 63%.” As a proper remedy for the family farm, Porter’s Pain King could be administered to family members, household pets, and even barnyard animals. (Copyright © the American Society of Anesthesiologists, Inc.)

George S. Bause, M.D., M.P.H., Honorary Curator, ASA’s Wood Library-Museum of Anesthesiology, Schaumburg, Illinois, and Clinical Associate Professor, Case Western Reserve University, Cleveland, Ohio. UJYC@aol.com.
